# Supplementary material for: Improving low fruit and vegetable intake in children: Findings from a system dynamics, community group model building study
Source: PubMed Central journal article supplement (PMC6695127; doi:10.1371/journal.pone.0221107), 2019-08-15
Supplement: pone.0221107.s002.pdf [file pone.0221107.s002.pdf]

# Eating F+V behaviour over time

Scale

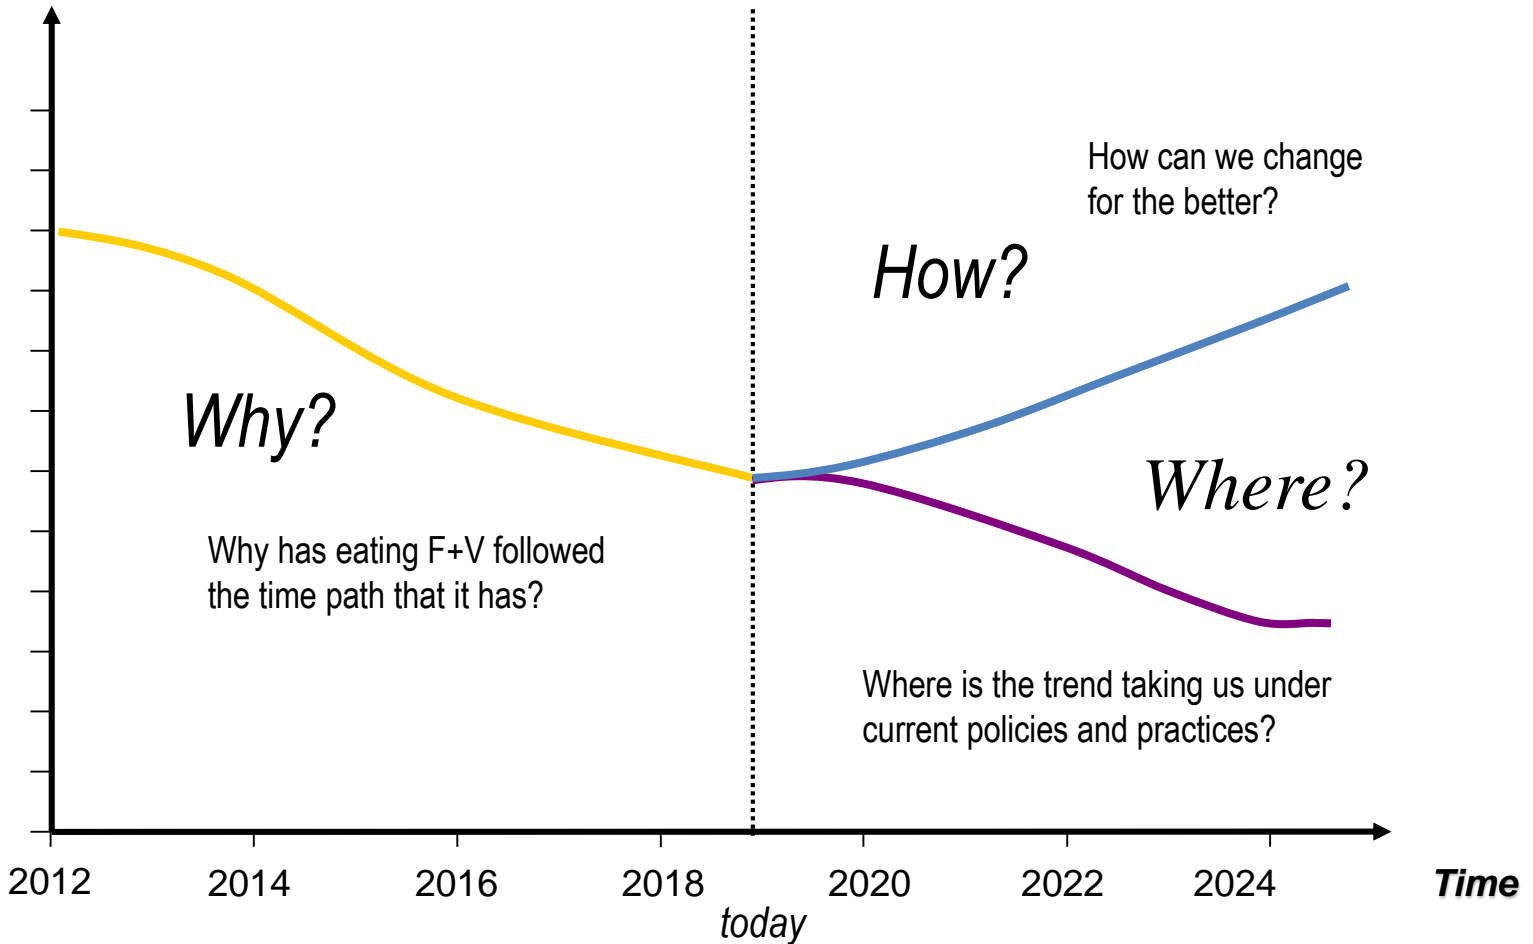

# Key variables over time

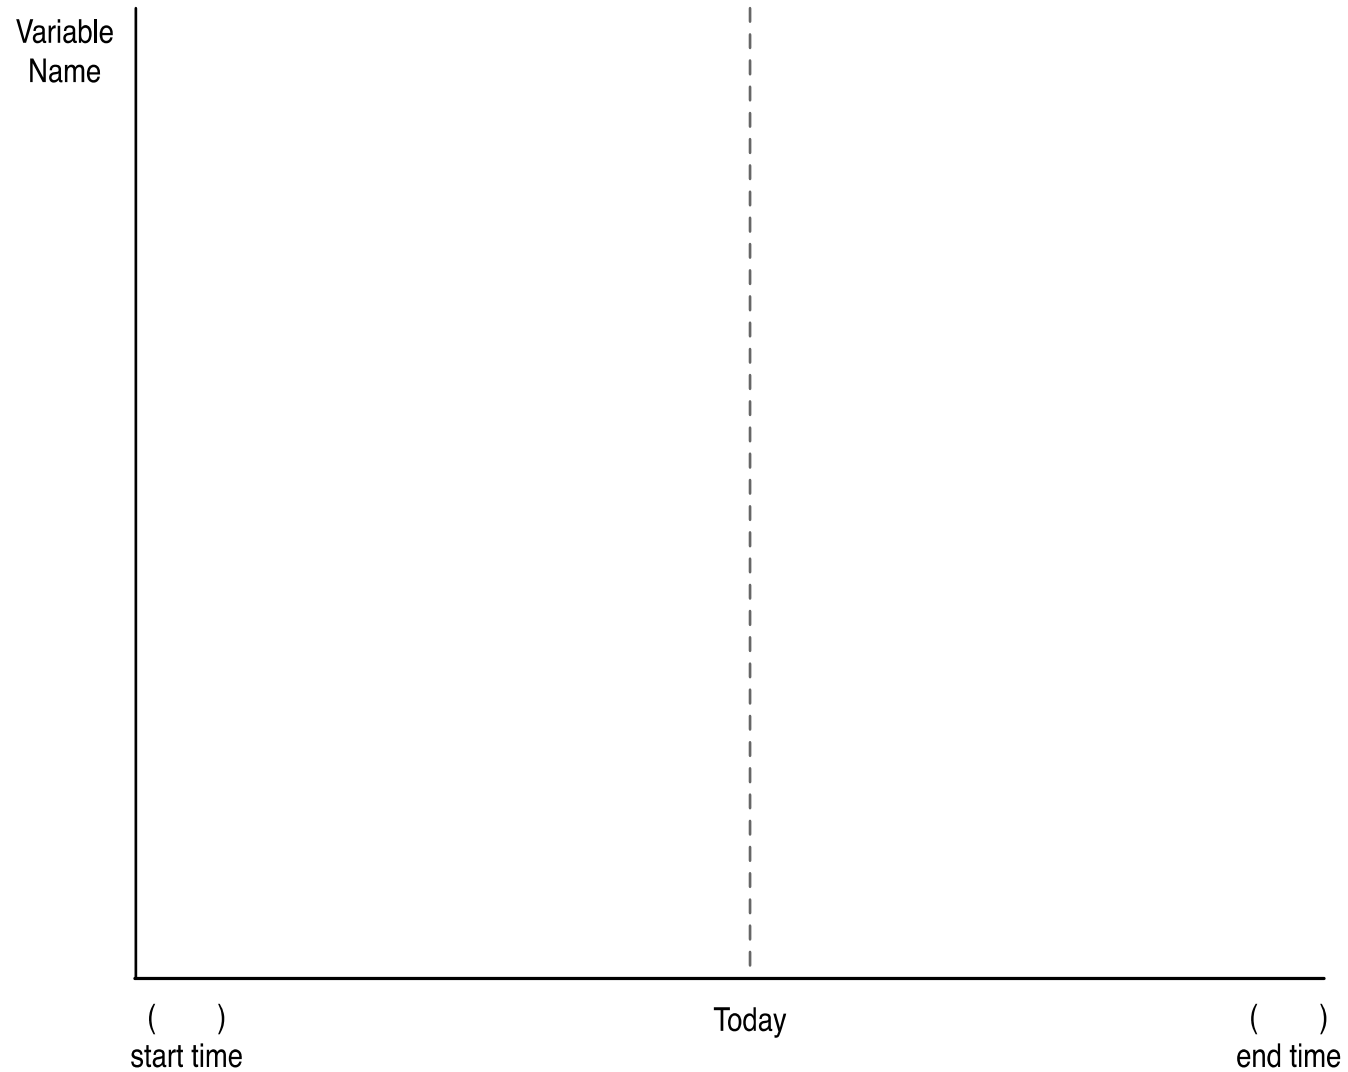

# Access to fast-food / number of takeaway outlets in neighbourhood / fast-food options

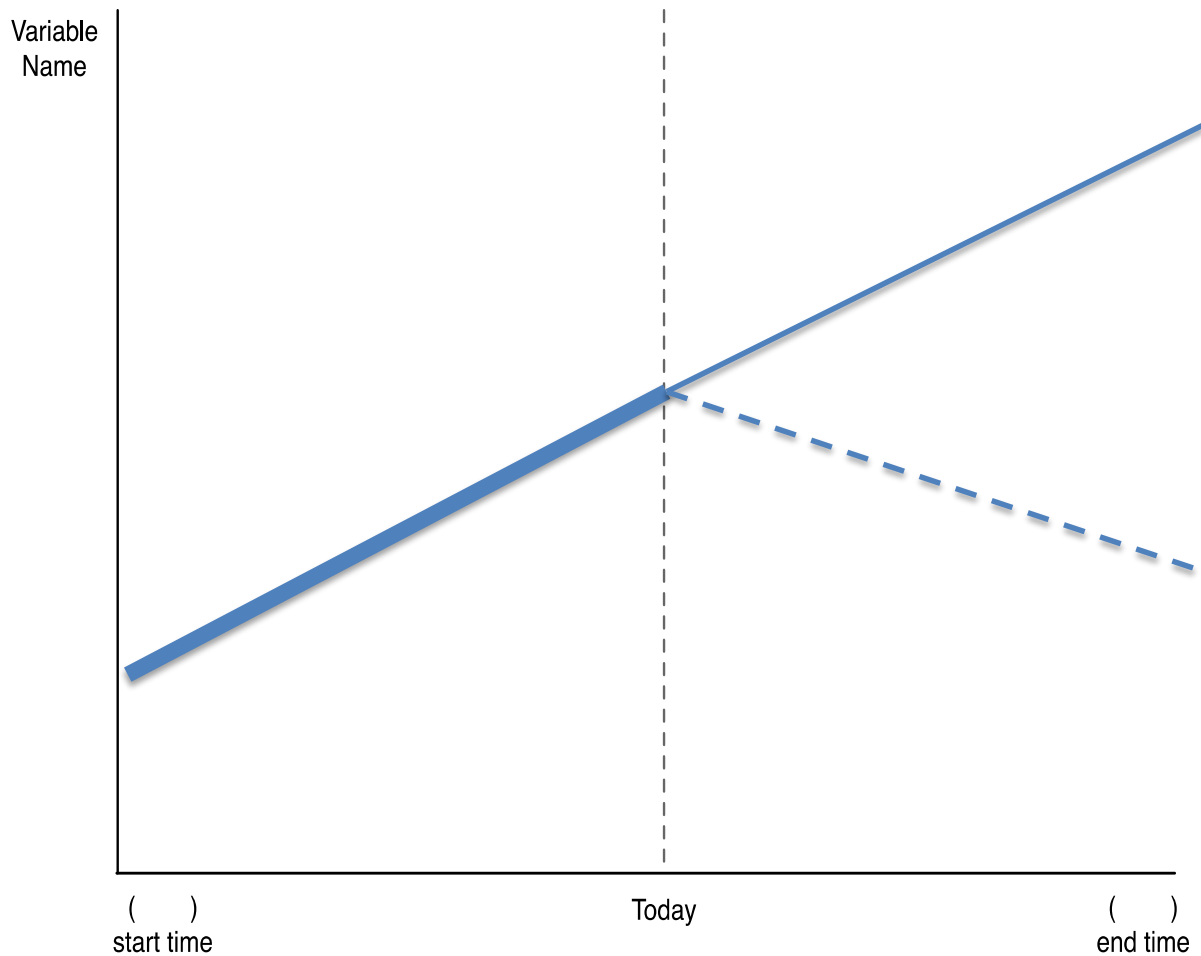

# Marketing of fast-food (on TV, social media and also sponsorship)



# Price of vegetables (e.g. kumara, cauliflower, broccoli, onions, potatoes)



# Price of fast-food (deals etc.)

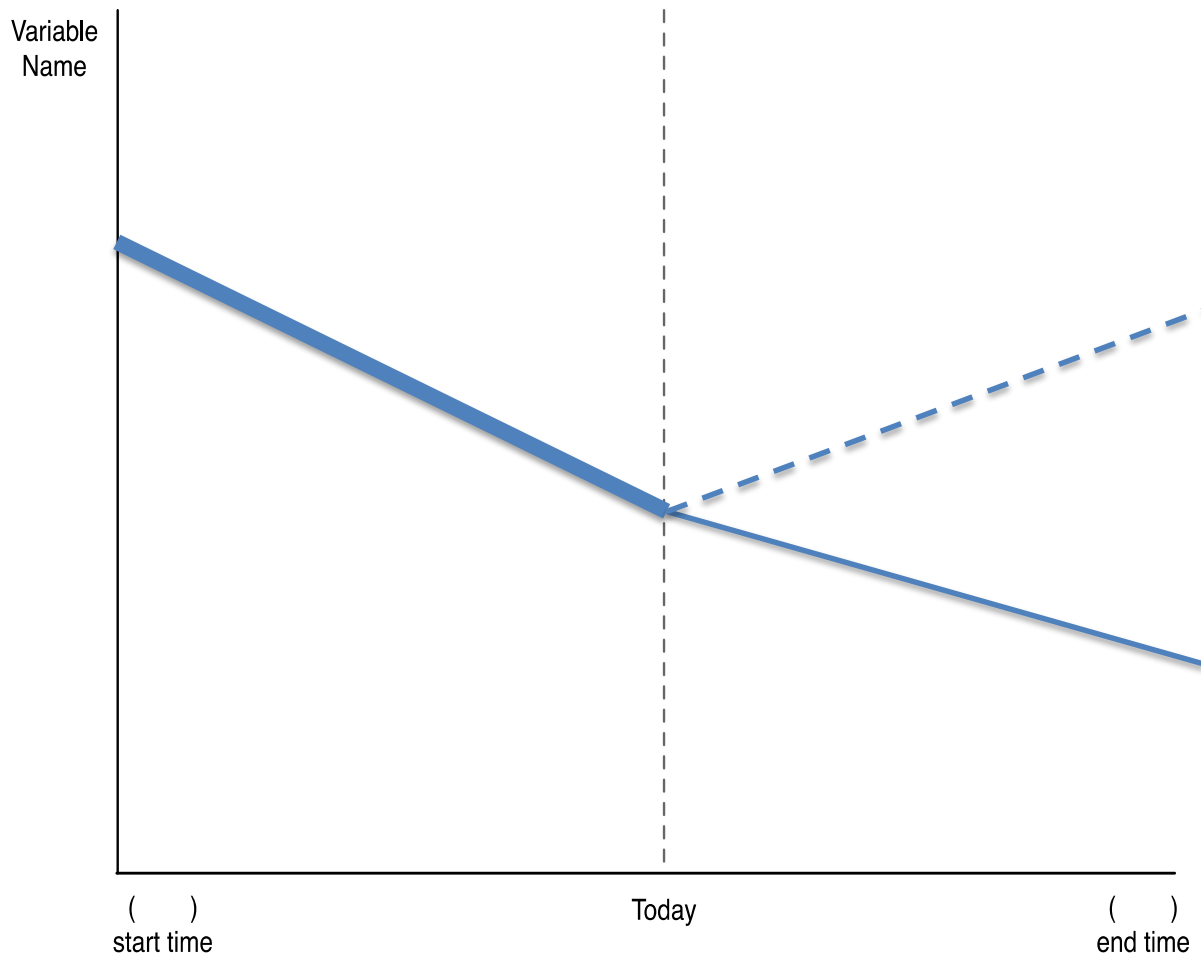

# Work-life (low-income, two parents working, inflexible hours, high work load)

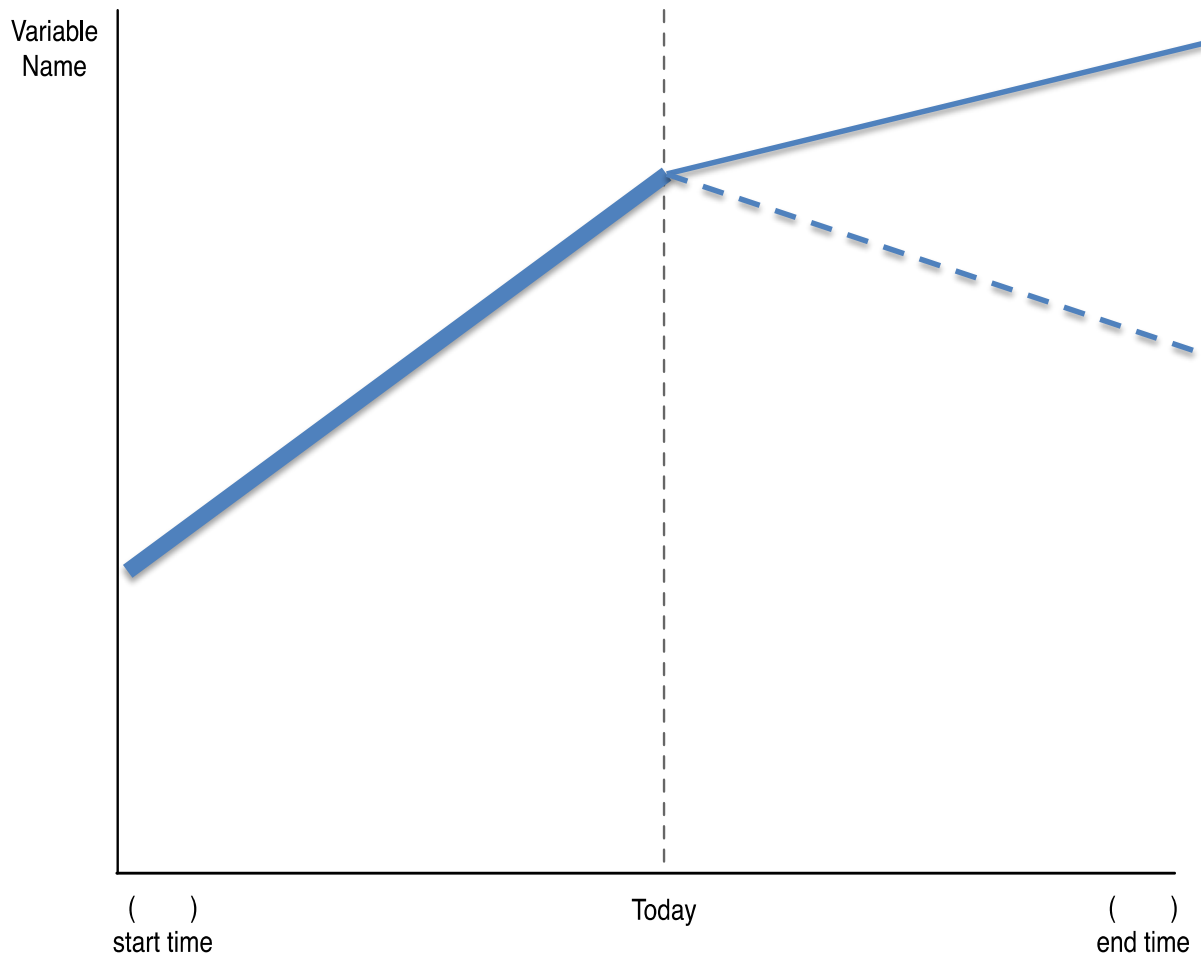

# Nutrition knowledge (due to confusion about nutrition, misleading information spread)

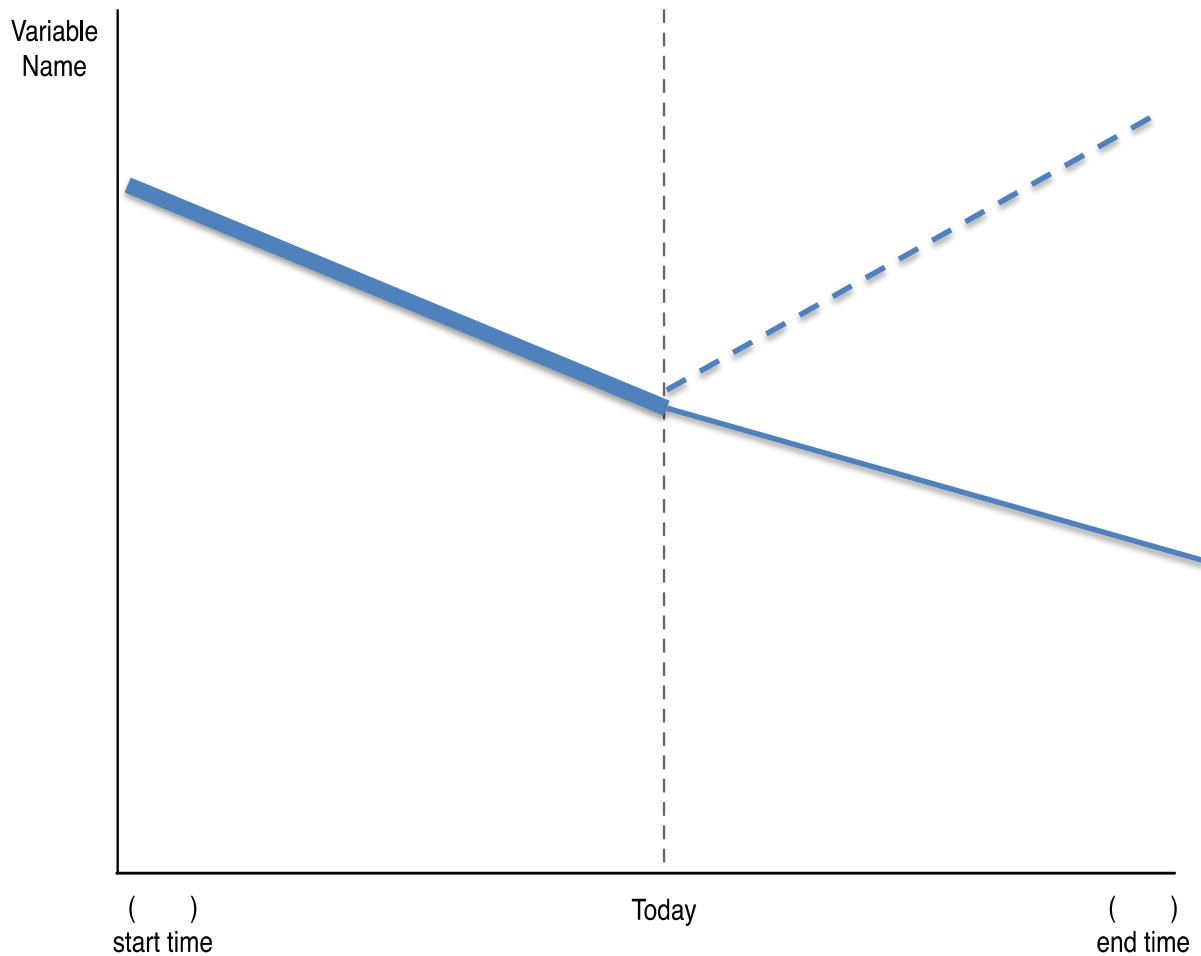



# Growing own vegetables and fruit trees (space to plant, access to gardens, sharing produce)

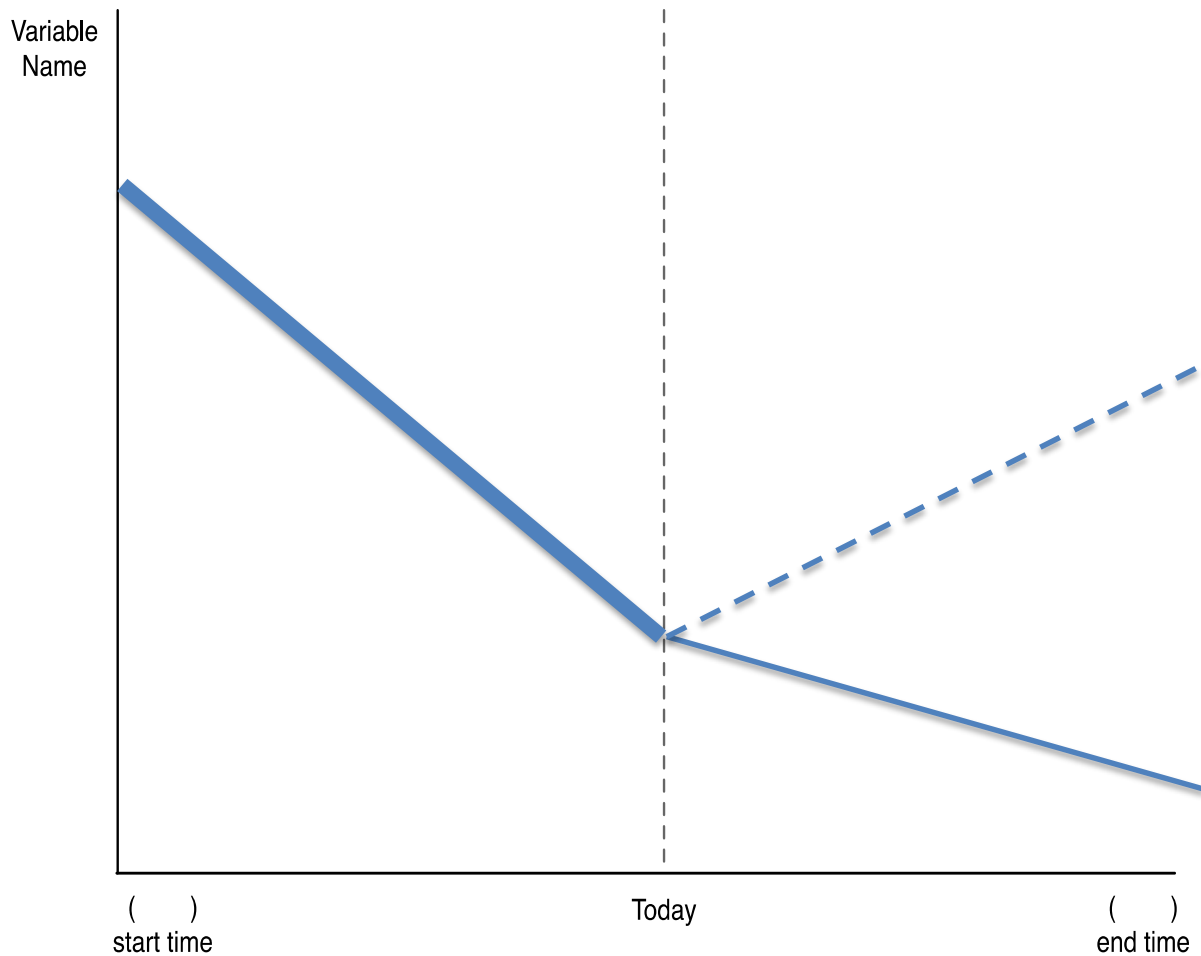

## Other variables mentioned

- Peer pressure / social pressure (increase)
- Eating lunches from home everyday (decrease)
- More pocket money given to children
- Trust in growers e.g. pesticides (decreasing)
- Perceived quality of fruit and veg in supermarkets (decreasing)
- Supplement use

## Some potentially positive trends

- Sampling / trying fruits and vegetables (increasing)
- Specialised food delivery with high fruit/veg (increasing)
- Cultural food options available in the community
