# Supplementary material for: Improving low fruit and vegetable intake in children: Findings from a system dynamics, community group model building study
Source: PubMed Central journal article supplement (PMC6695127; doi:10.1371/journal.pone.0221107), 2019-08-15

# Prioritising actions

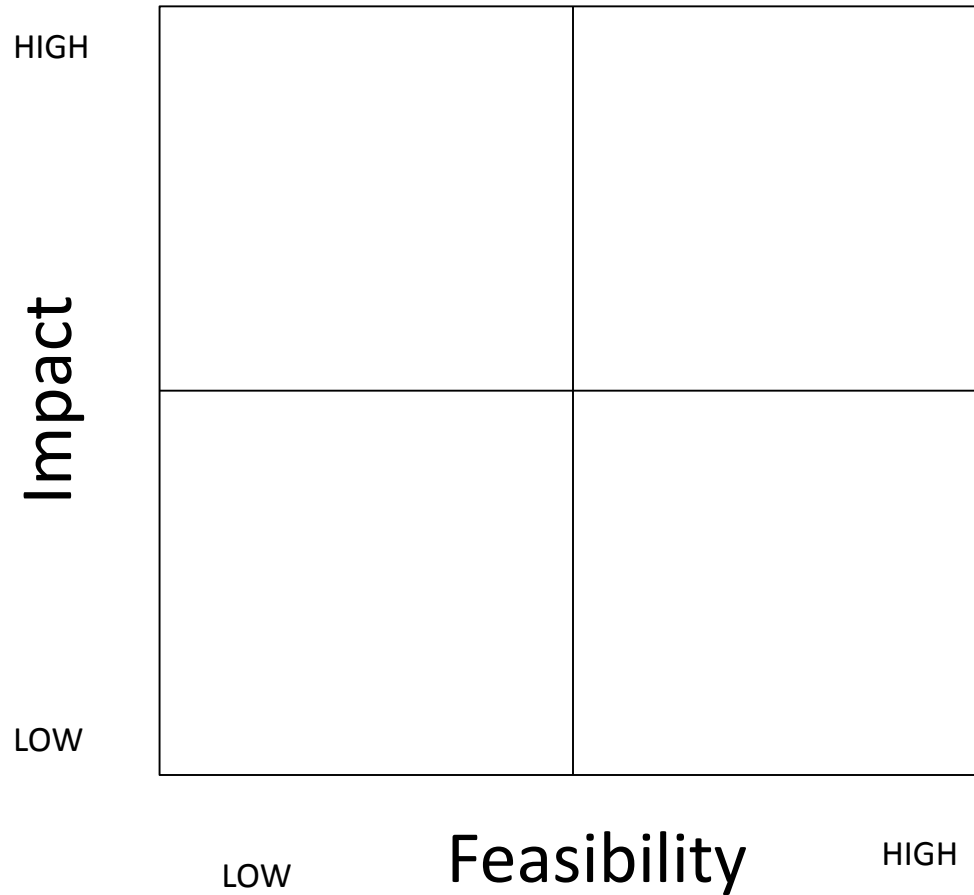

Supplement: pone.0221107.s005.pdf [file pone.0221107.s005.pdf]
